# Supplementary material for: Candidate Genes and Quantitative Trait Loci for Grain Yield and Seed Size in Durum Wheat
Source: PubMed Central journal article supplement (PMC7916090; doi:10.3390/plants10020312), 2021-02-05
Supplement: plants-10-00312-s001.pdf [file plants-10-00312-s001.pdf]

**Table S1.** Analysis of variance of grain yield (YLD), plant height (PH), heading time (HT), thousand kernel weight (TKW), grain length (GL), grain width (GW), grain area (AREA) in the Liberdur x Anco Marzio RIL mapping population evaluated at Valenzano (Bari, Italy) for three years.

| Year | Source of variation | df  | YLD       | PH         | HT         | TKW        | GL       | GW       | AREA      |
|------|---------------------|-----|-----------|------------|------------|------------|----------|----------|-----------|
| 2016 | Block               | 2   | 52.110*** | 8.674      | 3.619      | 94.895***  | 0.131*** | 0.195*** | 8.247***  |
|      | RIL                 | 132 | 4.720***  | 96.489***  | 239.341*** | 70.877***  | 0.364*** | 0.064*** | 6.416***  |
|      | Error               | 264 | 0.687     | 13.310     | 1.421      | 8.089      | 0.006    | 0.006    | 0.267     |
| 2017 | Block               | 2   | 7.422***  | 375.387*** | 2.279      | 14.845*    | 0.054*** | 0.001    | 0.297     |
|      | RIL                 | 132 | 0.639***  | 71.095***  | 122.914*** | 36.252***  | 0.307*** | 0.028*** | 3.209***  |
|      | Error               | 264 | 0.220     | 13.704     | 1.033      | 4.446      | 0.004    | 0.003    | 0.164     |
| 2018 | Block               | 2   | 7.560***  | 63.550*    | 8.021*     | 264.174*** | 0.103*** | 0.236*** | 11.557*** |
|      | RIL                 | 132 | 1.408***  | 107.644*** | 34.928***  | 59.814***  | 0.291*** | 0.046*** | 4.166***  |
|      | Error               | 264 | 0.514     | 19.352     | 1.185      | 14.168     | 0.006    | 0.013    | 0.634     |

\*, \*\* and \*\*\*: significant differences at 0.05P, 0.01P and 0.001P, respectively.
